# Supplementary material for: An electrochemical platform based on a hemin–rGO–cMWCNTs modified aptasensor for sensitive detection of kanamycin
Source: Royal Society of Chemistry journal article supplement (doi:10.1039/d1ra01135a), 2021-01-01
Supplement: d1ra01135a1.pdf [file d1ra01135a1.pdf]

ARTICLE

## An electrochemical platform based on hemin-rGO-cMWCNTs modified aptasensor for sensitive detection of kanamycin

Received 00th January 20xx,  
Accepted 00th January 20xx

DOI: 10.1039/x0xx00000x

Tianyi Gao<sup>a</sup>, Chong Sun<sup>b</sup>, Nana Zhang<sup>b</sup>, Yang Huang<sup>b</sup>, Hongxing Zhu<sup>b</sup>, Chunmei Wang<sup>d</sup>, Jinxuan Cao<sup>\*,a</sup>, Daoying Wang<sup>\*,b,c</sup>

### Supporting information

As shown in Fig. S1A, the background current of hemin-graphene-cMWCNTs/GCE (curve a) was increased tremendously than hemin-graphene-Au/GCE (curve b) because of the good conductivity of MWCNTs (Fig. S2A), which is consistent with EIS (Fig. S1B). The results *via* MTT, CD and electrochemistry showed hemin-graphene-cMWCNTs could play the role of an efficient electron-conducting tunnel and biocompatible spatial micro-environment.

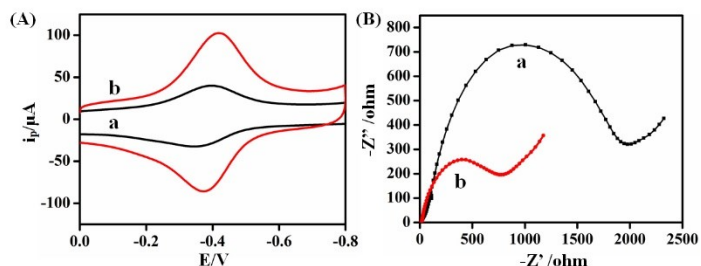

**Fig. S1.** (A) The CV of hemin-graphene-Au (curve a) and hemin-rGO-cMWCNTs (curve b). (B) Nyquist plot of Faradic impedance obtained in 0.10 M PBS (pH 6.0) for hemin-graphene-Au (curve a) and hemin-rGO-cMWCNTs (curve b)

The interaction between KANA and aptamer has been proven.<sup>1</sup> In this paper, fluorescence spectroscopy was used to determine the binding constant between the aptamer and KANA. Fig. S2 showed that KANA produced a maximum fluorescence emission peak at 305 nm by 250 nm excitation.

The binding constant between the aptamer-KANA interaction can be calculated by following equation.<sup>2</sup>

$$\lg[(F_0-F)/F] = \lg K_a + n \lg [Q]$$

Where  $K_a$  is the binding constant of the aptamer-kanamycin interaction. The values of  $K_a$  and  $n$  for mixture were calculated from the plot of  $\lg(F_0-F)/F$  versus  $\lg[Q]$  was showed in Fig. S2 and Table S1.

Fig. S2 and Table S1 showed that the binding constant of the aptamer-KANA at 288K was  $2.54 \times 10^3$ . It is showed the complex of the aptamer-KANA was stable and the affinity was high.<sup>3</sup> In other words, the aptamer/hemin-rGO-cMWCNTs/GCE shows high selectivity for KANA detection. Furthermore, hemin-rGO-cMWCNTs have large surface to volume ratio and good biocompatibility, which was conducive to bind with a mass of aptamer. Thus, it can meet all kinds of problems in food detection, such as a large number of samples, large test types, and the timeliness of food, with satisfactory results.

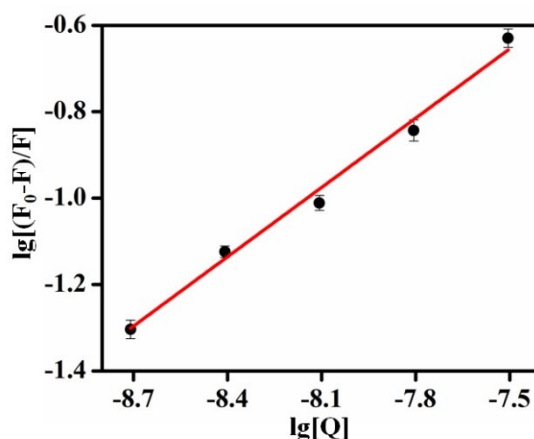

**Fig. S2.** Lineweaver-Burk curve of fluorescence quenching of the aptamer-KANA at 288 K.

<sup>a</sup> Key Laboratory of Animal Protein Food Processing Technology of Zhejiang Province, Ningbo University, Ningbo 315211, P. R. China. E-mail: caojinxuan@nbu.edu.cn

<sup>b</sup> Institute of Agricultural Products Processing, Jiangsu Academy of Agricultural Sciences, Nanjing 210014, P. R. China. E-mail: daoyingwang@yahoo.com

<sup>c</sup> Jiangsu Key Laboratory for Food Quality and Safety-State Key Laboratory Cultivation Base, Ministry of Science and Technology, Nanjing, Jiangsu, 210014, China

<sup>d</sup> Central Laboratory, Jiangsu Academy of Agricultural Sciences, Nanjing 210014, P. R. China.

## ARTICLE

Table S1. Binding constant  $K_a$  and number of binding sites of the aptamer-kanamycin at 288 K.

| T/K | Lineweaver-Burk equation        | R <sup>2</sup> | $K_a/(L \cdot mol^{-1})$ |
|-----|---------------------------------|----------------|--------------------------|
| 288 | $lg[(F_0-F)/F]=0.54 lg[Q]+3.41$ | 0.99           | $2.54 \times 10^3$       |

## Notes and references

- 1 H. Li, D. E. Sun, Y. J. Liu and Z. H. Liu, *Biosensors & Bioelectronics*, 2014, **55**, 149-156.
- 2 X. Wu, X. Zhao, Z. Deng, X. Liang and S. Fang, *Journal of Molecular Liquids*, 2020, 114873.
- 3 X. Zhou and J. F. Liang, *Journal of Photochemistry and Photobiology A: Chemistry*, 2017, **349**, 124-128.
